# Supplementary material for: Sp100 colocalizes with HPV replication foci and restricts the productive stage of the infectious cycle
Source: PubMed Central journal article supplement (PMC5638619; doi:10.1371/journal.ppat.1006660), 2017-10-02

A

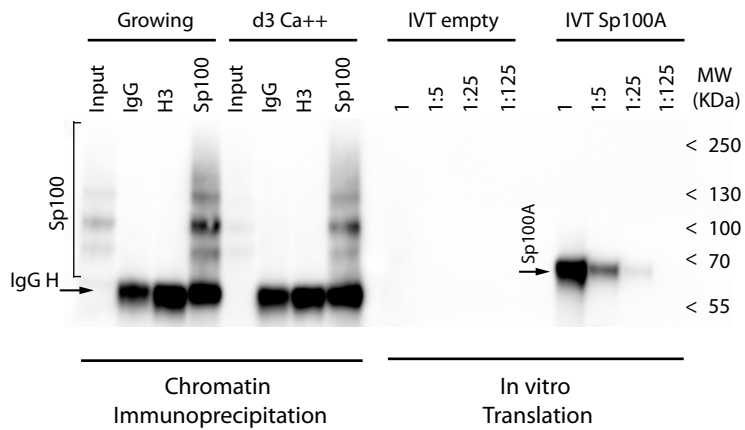

B

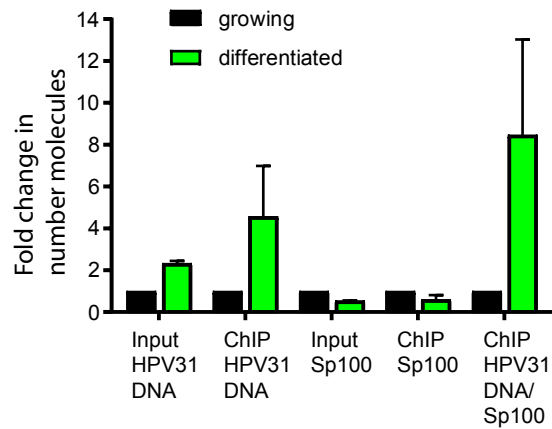

Supplement: ppat.1006660.s005.pdf [file ppat.1006660.s005.pdf]
