# Supplementary material for: Sp100 colocalizes with HPV replication foci and restricts the productive stage of the infectious cycle
Source: PubMed Central journal article supplement (PMC5638619; doi:10.1371/journal.ppat.1006660), 2017-10-02
Supplement: ppat.1006660.s006.pdf [file ppat.1006660.s006.pdf]

HPV16 + cervix

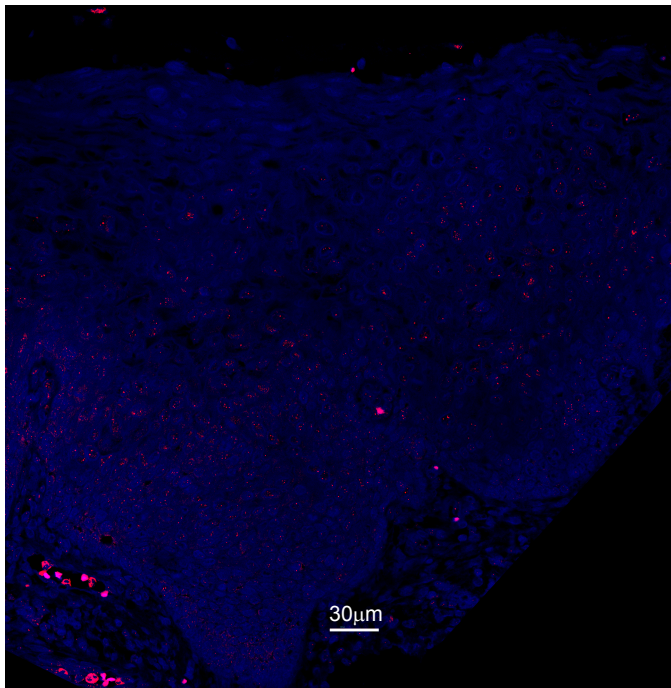

normal cervix

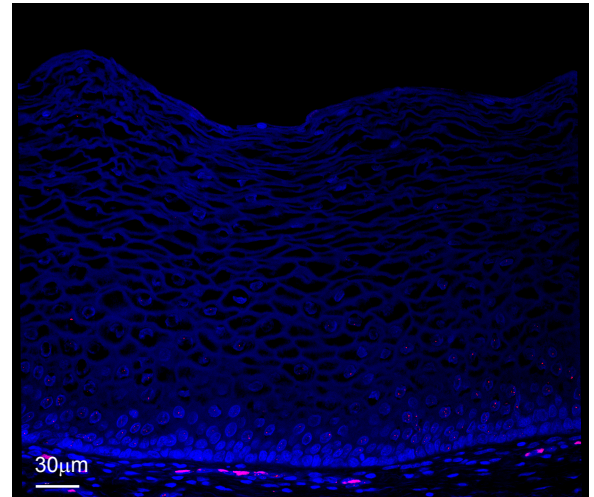

stratum  
granulosum

stratum  
spinosum

stratum  
basale

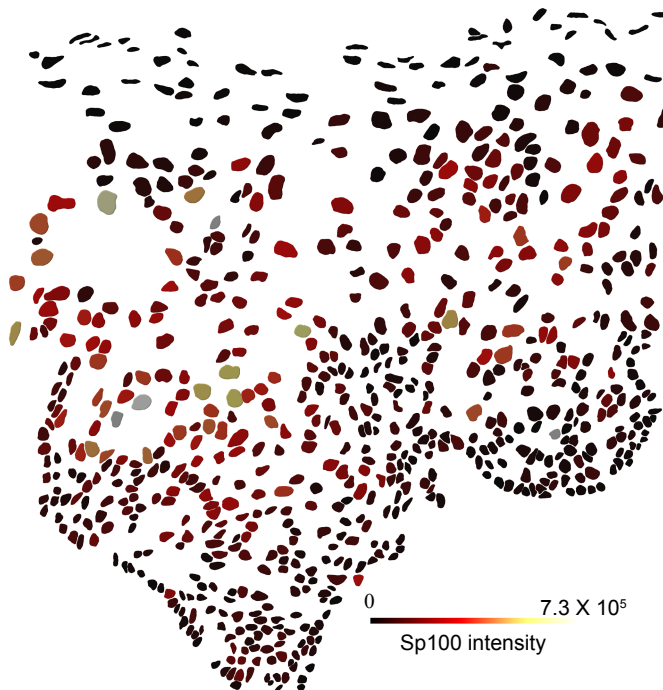

stratum  
granulosum

stratum  
spinosum

stratum  
basale

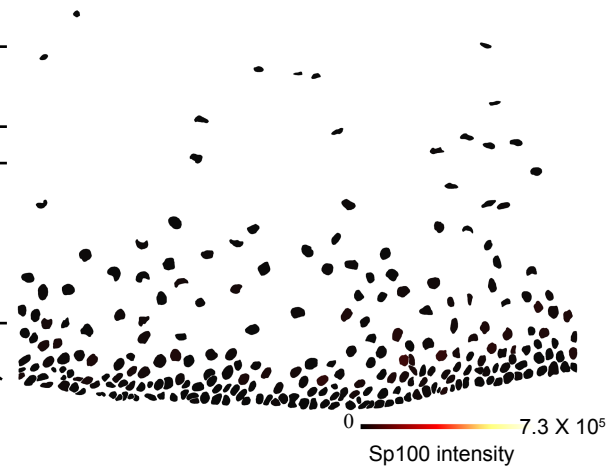

0  $7.3 \times 10^5$   
Sp100 intensity

0  $7.3 \times 10^5$   
Sp100 intensity
