# Supplementary material for: Sp100 colocalizes with HPV replication foci and restricts the productive stage of the infectious cycle
Source: PubMed Central journal article supplement (PMC5638619; doi:10.1371/journal.ppat.1006660), 2017-10-02
Supplement: ppat.1006660.s008.pdf [file ppat.1006660.s008.pdf]

**Supplementary Table 2. siRNA sequences**

| <b>Target mRNA</b>    | <b>Sequence (5'-3')</b>   |
|-----------------------|---------------------------|
| Non-targeting Control | 5'-UGGUUUACAUGUCGACUAA-3' |
|                       | 5'-UGGUUUACAUGUUGUGUGA-3' |
|                       | 5'-UGGUUUACAUGUUUUCUGA-3' |
|                       | 5'-UGGUUUACAUGUUUCCUA-3'  |
| PML                   | 5'-GCAACCAGUCGGUGCGUGA-3' |
|                       | 5'-GGACAUGCACGGUUUCCUG-3' |
|                       | 5'-GAGCUCAAGUGCGACAUCA-3' |
|                       | 5'-GGAAAGAUGCAGCUGUAUC-3' |
| SP100                 | 5'-GAAGUGAGCCUGUGAUCAA-3' |
|                       | 5'-AGGCAUAGAUCUAAAGUAA-3' |
|                       | 5'-UACCAGAGCCCAUGGAUUU-3' |
|                       | 5'-GAAGGGCACUCUAUAUAAG-3' |
